# Supplementary material
Source: PubMed Central journal article supplement (PMC4967012)

**FIGURE S1, Related to Experimental Procedures**

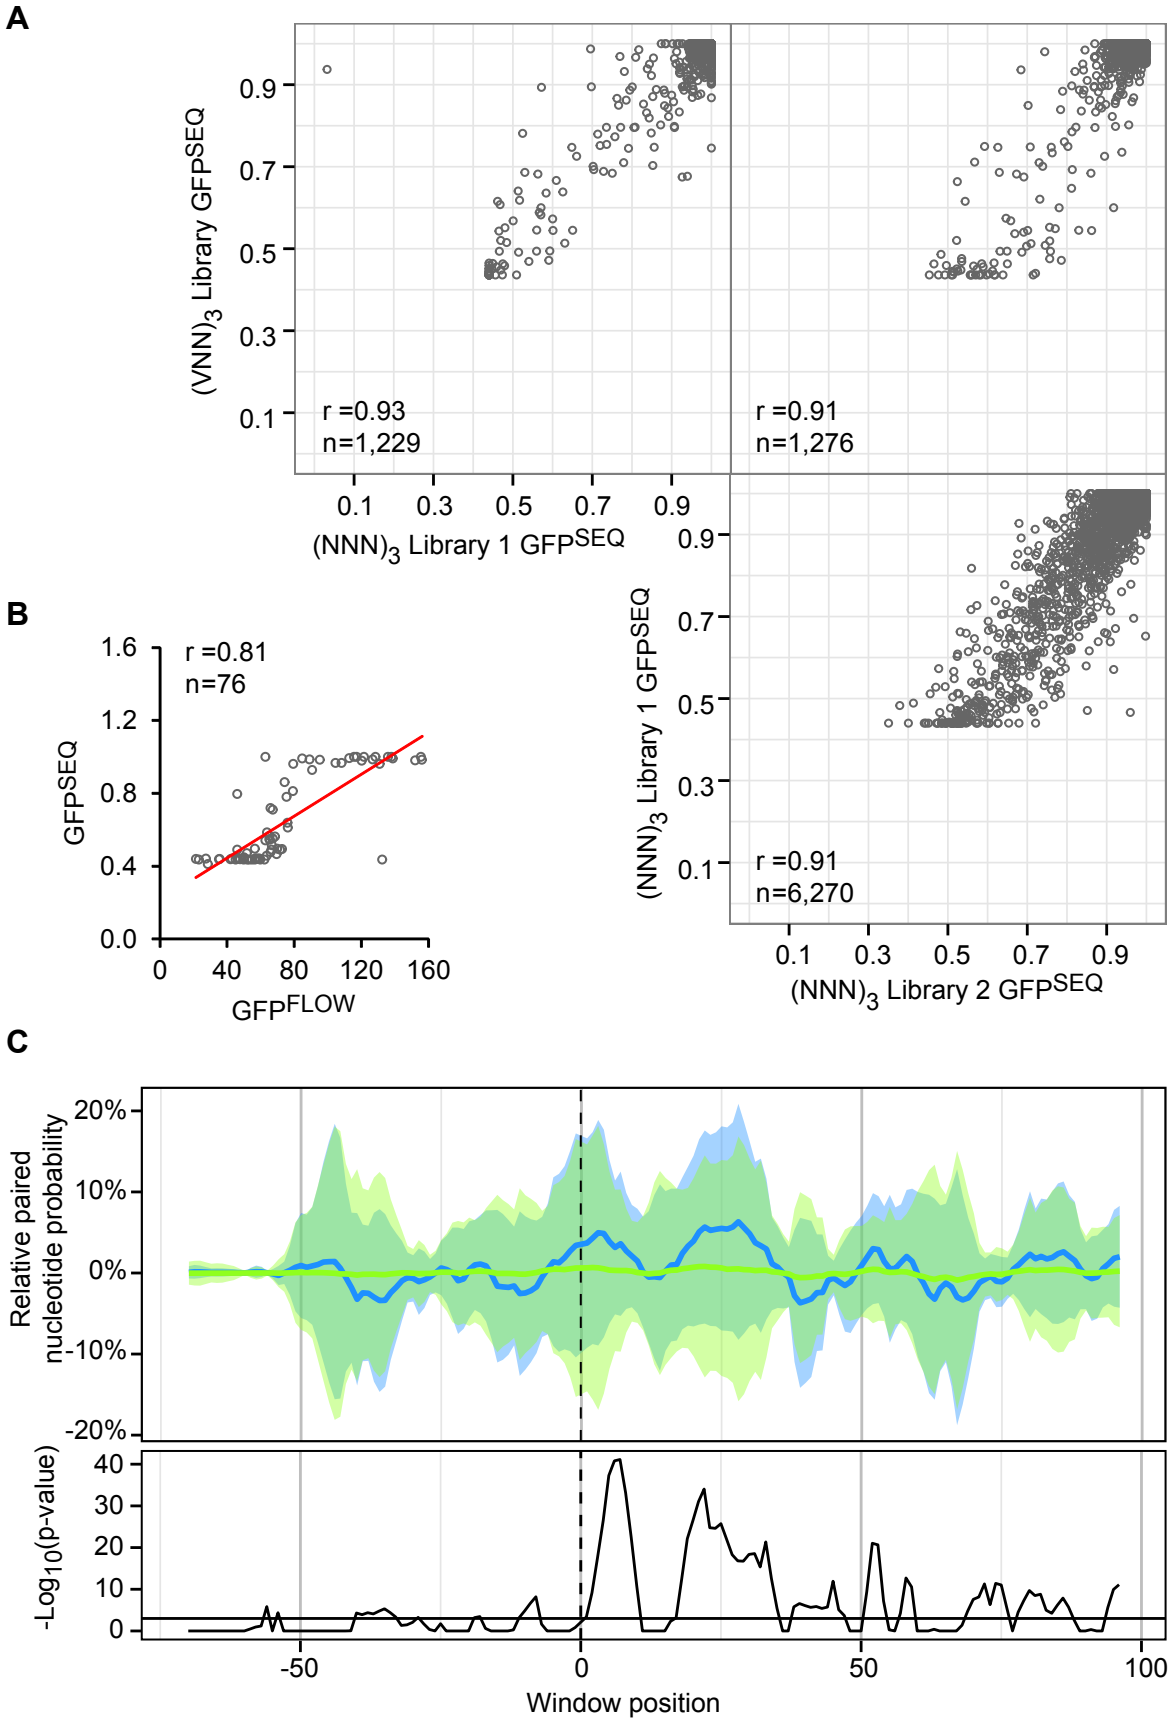

Supplement: NIHMS800838-supplement-1.pdf [file NIHMS800838-supplement-1.pdf]

**FIGURE S2, Related to Figure 2**

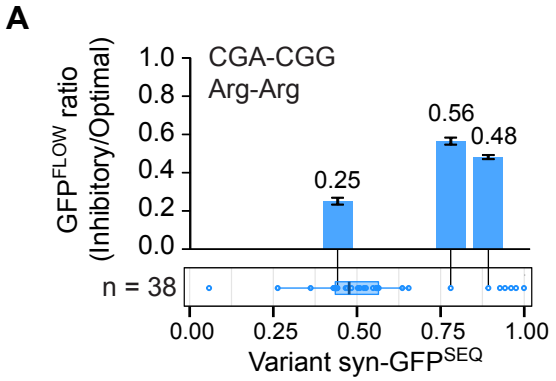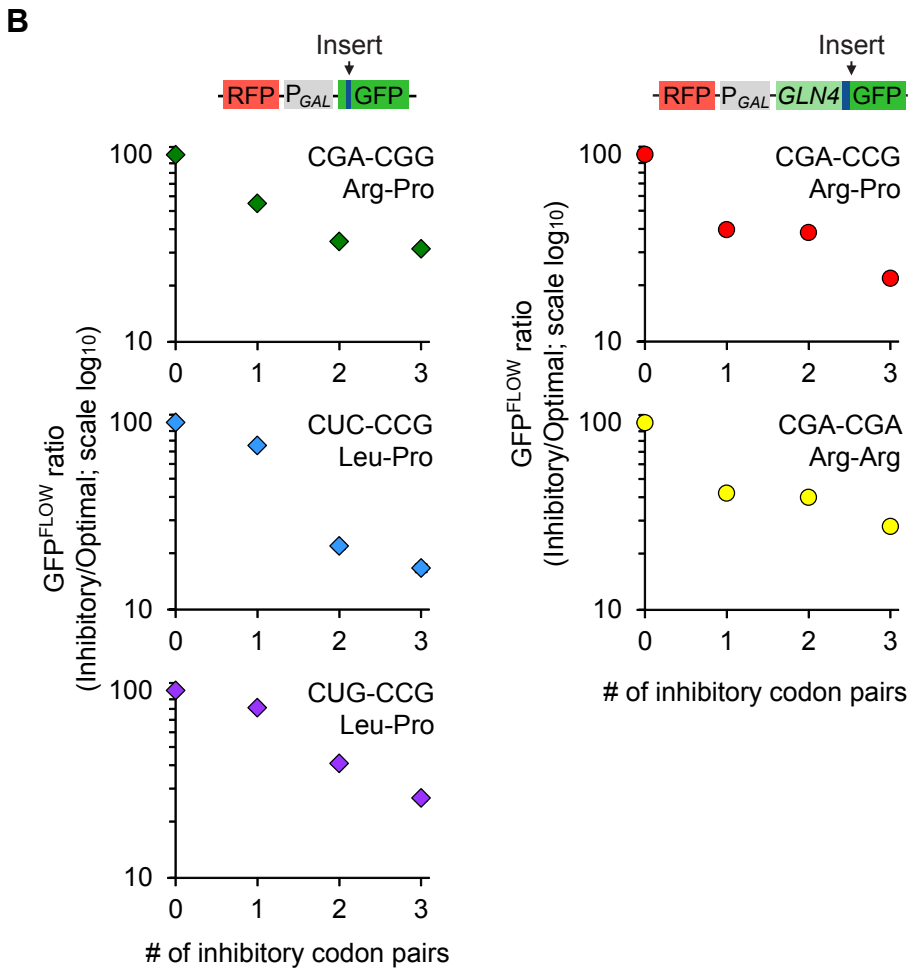

Supplement: NIHMS800838-supplement-2.pdf [file NIHMS800838-supplement-2.pdf]

**FIGURE S3, Related to Figure 3**

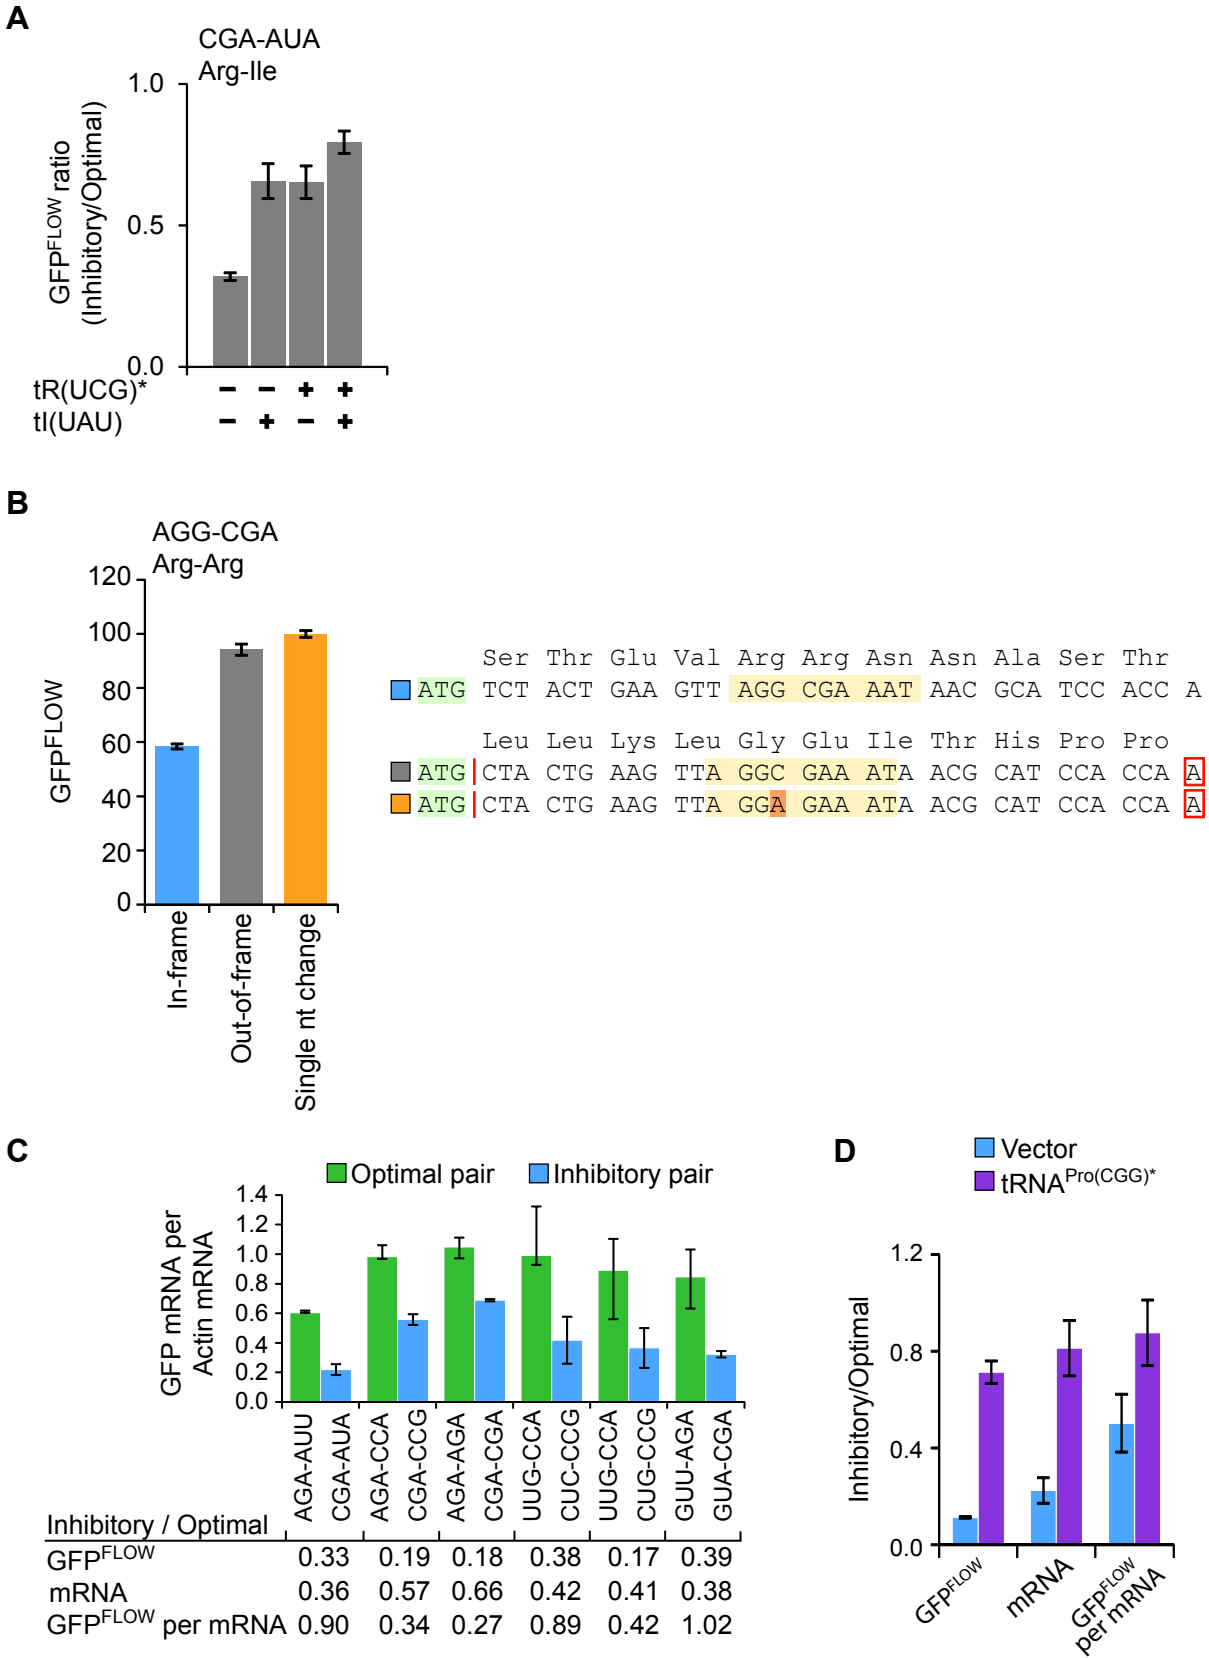

Supplement: NIHMS800838-supplement-3.pdf [file NIHMS800838-supplement-3.pdf]
